# Supplementary material for: Targeted UHPLC-MS Analysis Reveals Disparate Polyphenol Composition and Concentration in Muscadine Grape Supplements with Proportional Antioxidant Activity
Source: MDPI journal article supplement (doi:10.3390/antiox11112117), 2022-10-27
Supplement: s1 [file s1]

**Table S1. Retention times and mass to charge ratios of phenolic standards**

| <b>Phenolic Compounds</b>    | <b>Molecular Formula</b>                          | <b>Retention (mins)</b> | <b>m/z (actual)</b> | <b>m/z (theoretical)</b> | <b>Error (ppm)</b> |
|------------------------------|---------------------------------------------------|-------------------------|---------------------|--------------------------|--------------------|
| <b>Gallic</b>                | <b>C<sub>7</sub>H<sub>6</sub>O<sub>5</sub></b>    | <b>0.826</b>            | <b>169.0129</b>     | <b>169.0143</b>          | <b>-8.2833</b>     |
| <b>Gallocatechin</b>         | <b>C<sub>15</sub>H<sub>14</sub>O<sub>7</sub></b>  | <b>0.967</b>            | <b>305.0442</b>     | <b>305.0667</b>          | <b>-73.7544</b>    |
| <b>Epigallocatechin</b>      | <b>C<sub>15</sub>H<sub>14</sub>O<sub>7</sub></b>  | <b>1.377</b>            | <b>305.0398</b>     | <b>305.0667</b>          | <b>-88.1774</b>    |
| <b>Isotopic Catechin</b>     | <b>C<sub>15</sub>H<sub>14</sub>O<sub>6</sub></b>  | <b>1.515</b>            | <b>292.0903</b>     | <b>292.0818</b>          | <b>29.1014</b>     |
| <b>Catechin</b>              | <b>C<sub>15</sub>H<sub>14</sub>O<sub>6</sub></b>  | <b>1.525</b>            | <b>289.0435</b>     | <b>289.0718</b>          | <b>-101.3589</b>   |
| <b>Caffeic</b>               | <b>C<sub>9</sub>H<sub>8</sub>O<sub>4</sub></b>    | <b>1.814</b>            | <b>179.0337</b>     | <b>179.0350</b>          | <b>-7.2612</b>     |
| <b>Procyanidin B2</b>        | <b>C<sub>30</sub>H<sub>26</sub>O<sub>12</sub></b> | <b>1.899</b>            | <b>577.1368</b>     | <b>577.1352</b>          | <b>2.7723</b>      |
| <b>Epicatechin</b>           | <b>C<sub>15</sub>H<sub>14</sub>O<sub>6</sub></b>  | <b>1.997</b>            | <b>289.0723</b>     | <b>289.0718</b>          | <b>-97.7681</b>    |
| <b>Gallocatechin gallate</b> | <b>C<sub>22</sub>H<sub>18</sub>O<sub>11</sub></b> | <b>2.109</b>            | <b>457.0801</b>     | <b>457.0776</b>          | <b>12.033</b>      |
| <b>p-Coumaric</b>            | <b>C<sub>9</sub>H<sub>8</sub>O<sub>3</sub></b>    | <b>2.345</b>            | <b>163.0376</b>     | <b>163.0401</b>          | <b>-15.3337</b>    |
| <b>Catechin gallate</b>      | <b>C<sub>22</sub>H<sub>18</sub>O<sub>10</sub></b> | <b>2.505</b>            | <b>441.0846</b>     | <b>441.0827</b>          | <b>4.3078</b>      |
| <b>Ferrulic</b>              | <b>C<sub>10</sub>H<sub>10</sub>O<sub>4</sub></b>  | <b>2.704</b>            | <b>193.0438</b>     | <b>193.0501</b>          | <b>-32.6340</b>    |
| <b>Ellagic</b>               | <b>C<sub>14</sub>H<sub>6</sub>O<sub>8</sub></b>   | <b>2.779</b>            | <b>301.0019</b>     | <b>300.9990</b>          | <b>9.6346</b>      |
| <b>Myricetin</b>             | <b>C<sub>15</sub>H<sub>10</sub>O<sub>8</sub></b>  | <b>2.938</b>            | <b>317.0272</b>     | <b>317.0303</b>          | <b>-9.7783</b>     |
| <b>Resveratrol</b>           | <b>C<sub>14</sub>H<sub>12</sub>O<sub>3</sub></b>  | <b>2.923</b>            | <b>227.0418</b>     | <b>227.0714</b>          | <b>-119.3457</b>   |
| <b>Quercetin</b>             | <b>C<sub>15</sub>H<sub>10</sub>O<sub>7</sub></b>  | <b>3.309</b>            | <b>301.0297</b>     | <b>301.0348</b>          | <b>-16.9416</b>    |
| <b>Kaempferol</b>            | <b>C<sub>15</sub>H<sub>10</sub>O<sub>6</sub></b>  | <b>3.578</b>            | <b>285.0369</b>     | <b>285.0405</b>          | <b>-12.6298</b>    |
